# Supplementary material
Source: Research Square preprint supplement (doi:10.21203/rs.3.rs-10195517/v1)
Supplement: Supplementary file 1 [file 15c302b102e7d0bdca5a11a3.docx]

**Baicalin-Loaded MOF-818 Nanozyme for Ischemic Stroke Treatment via ROS Scavenging and Neuroinflammation Suppression**

**
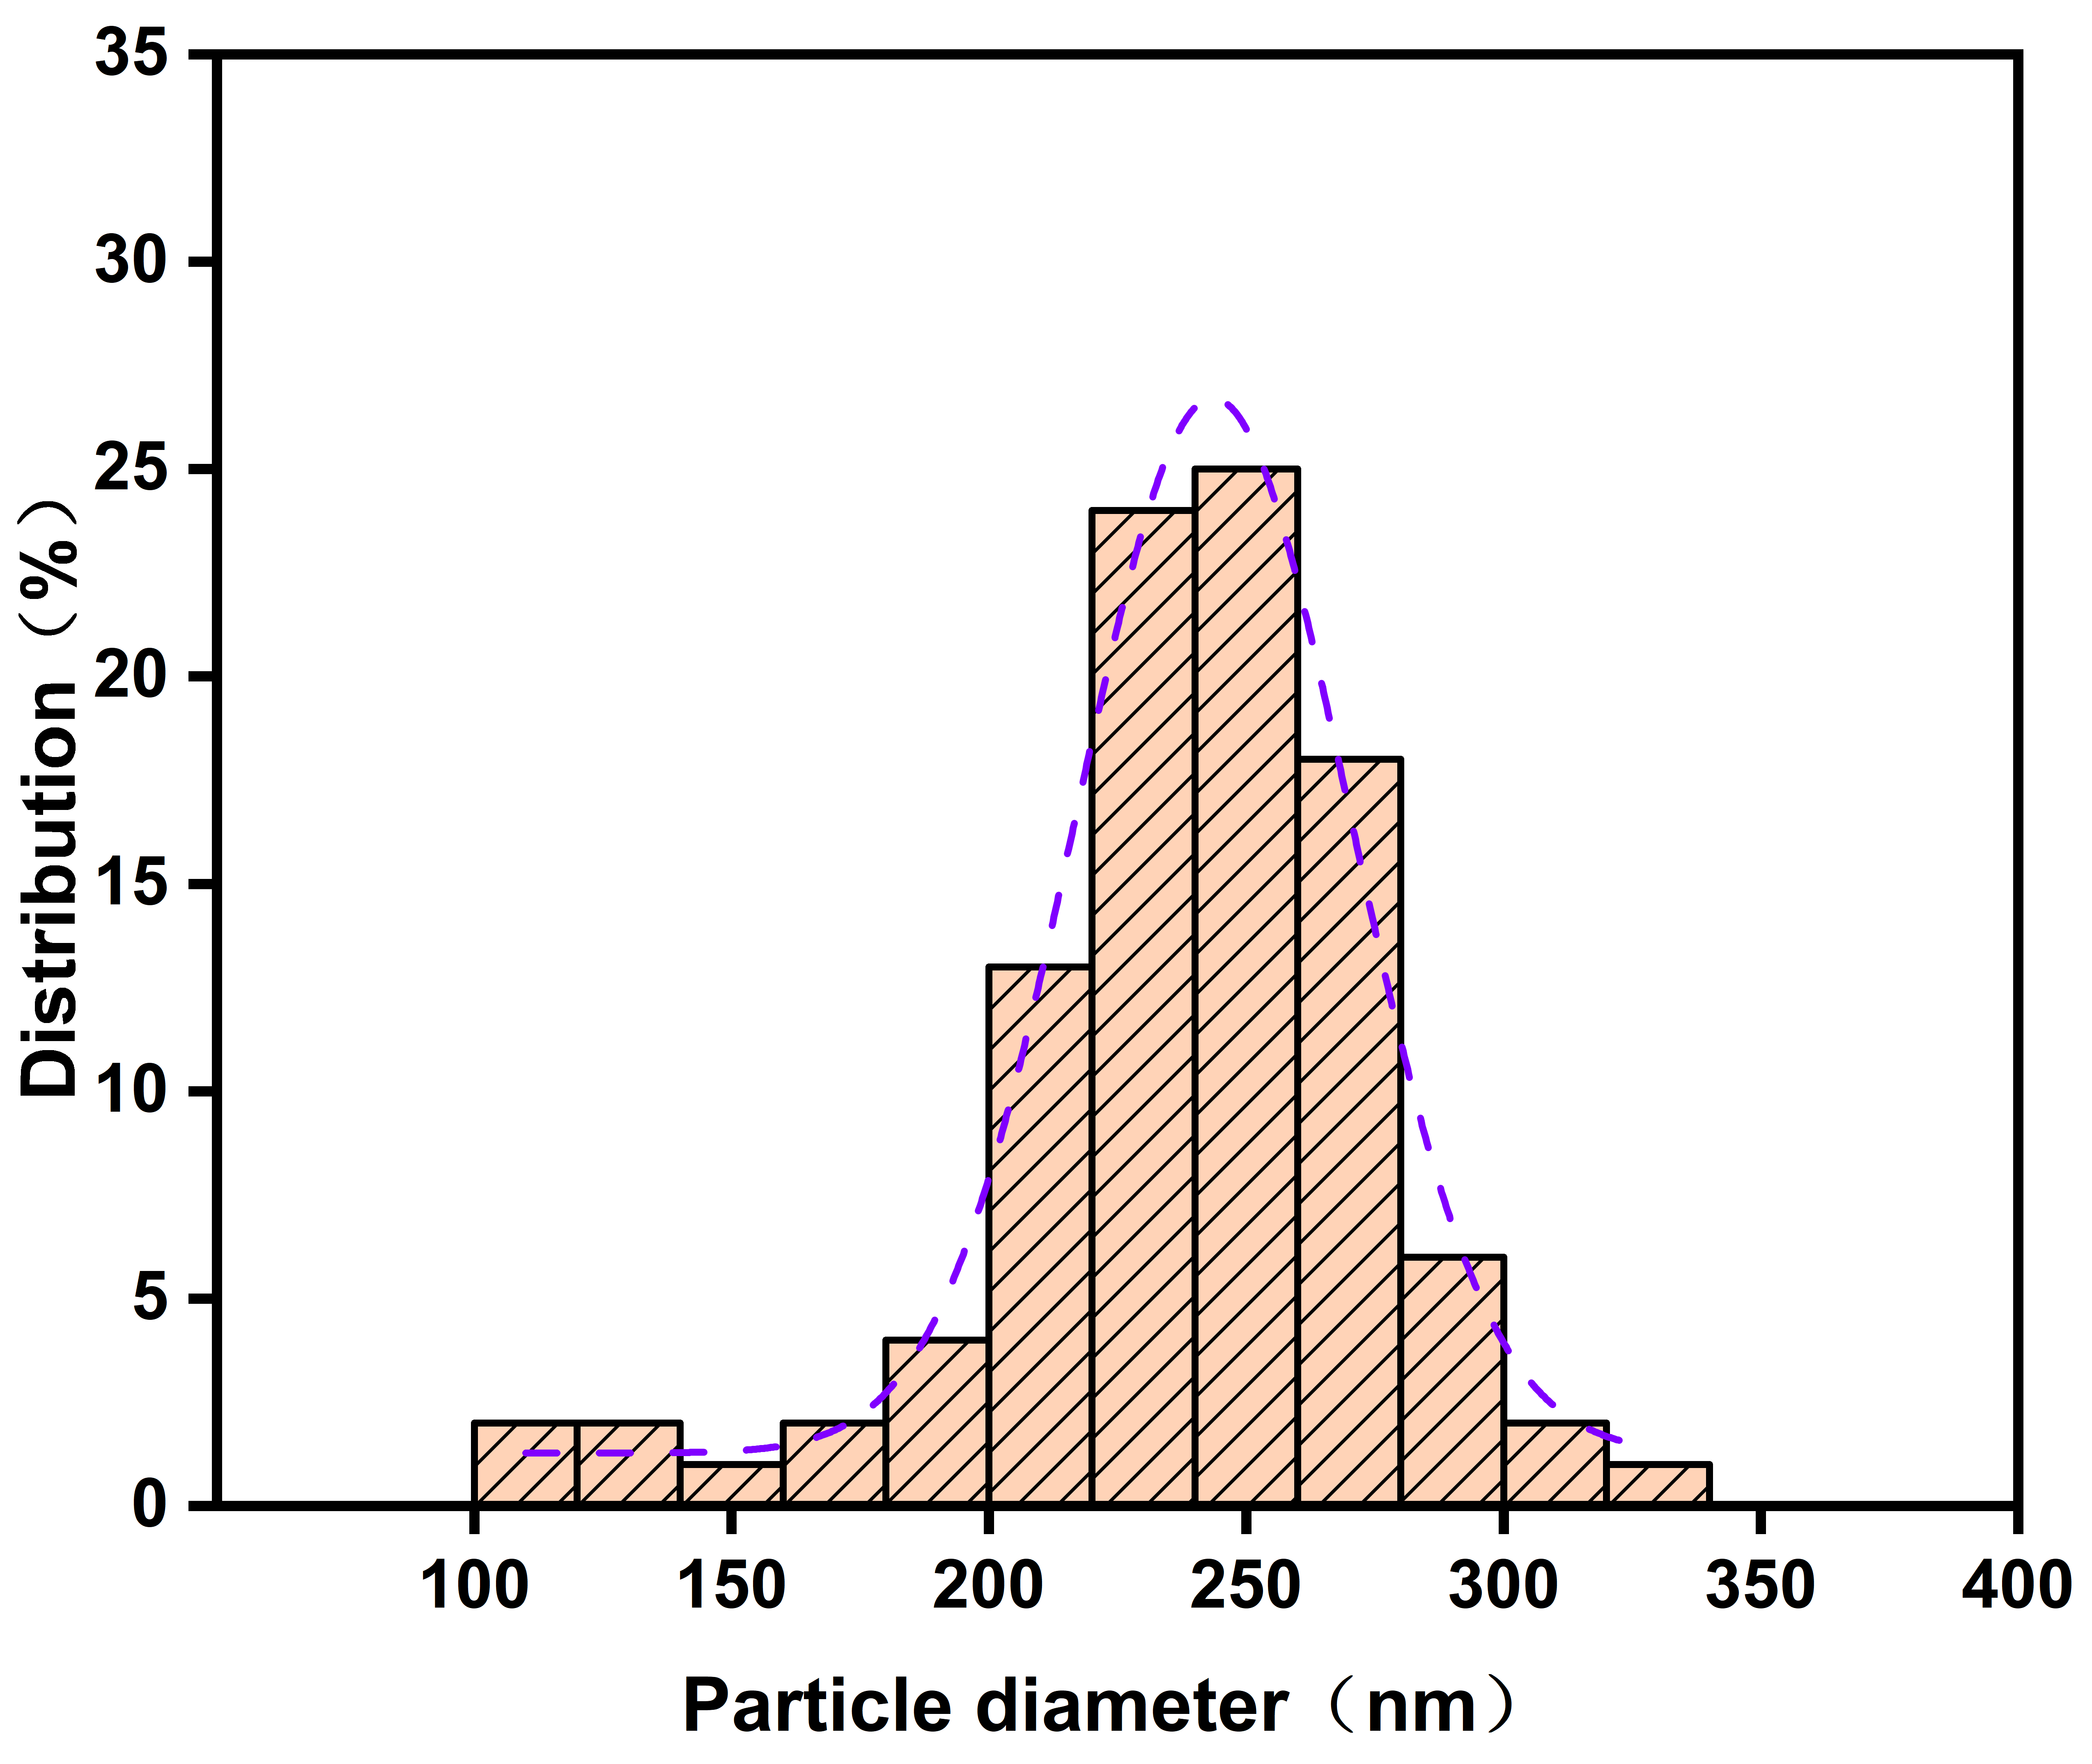
**

**Fig. S1.** Pore distribution of MOF-818.

**
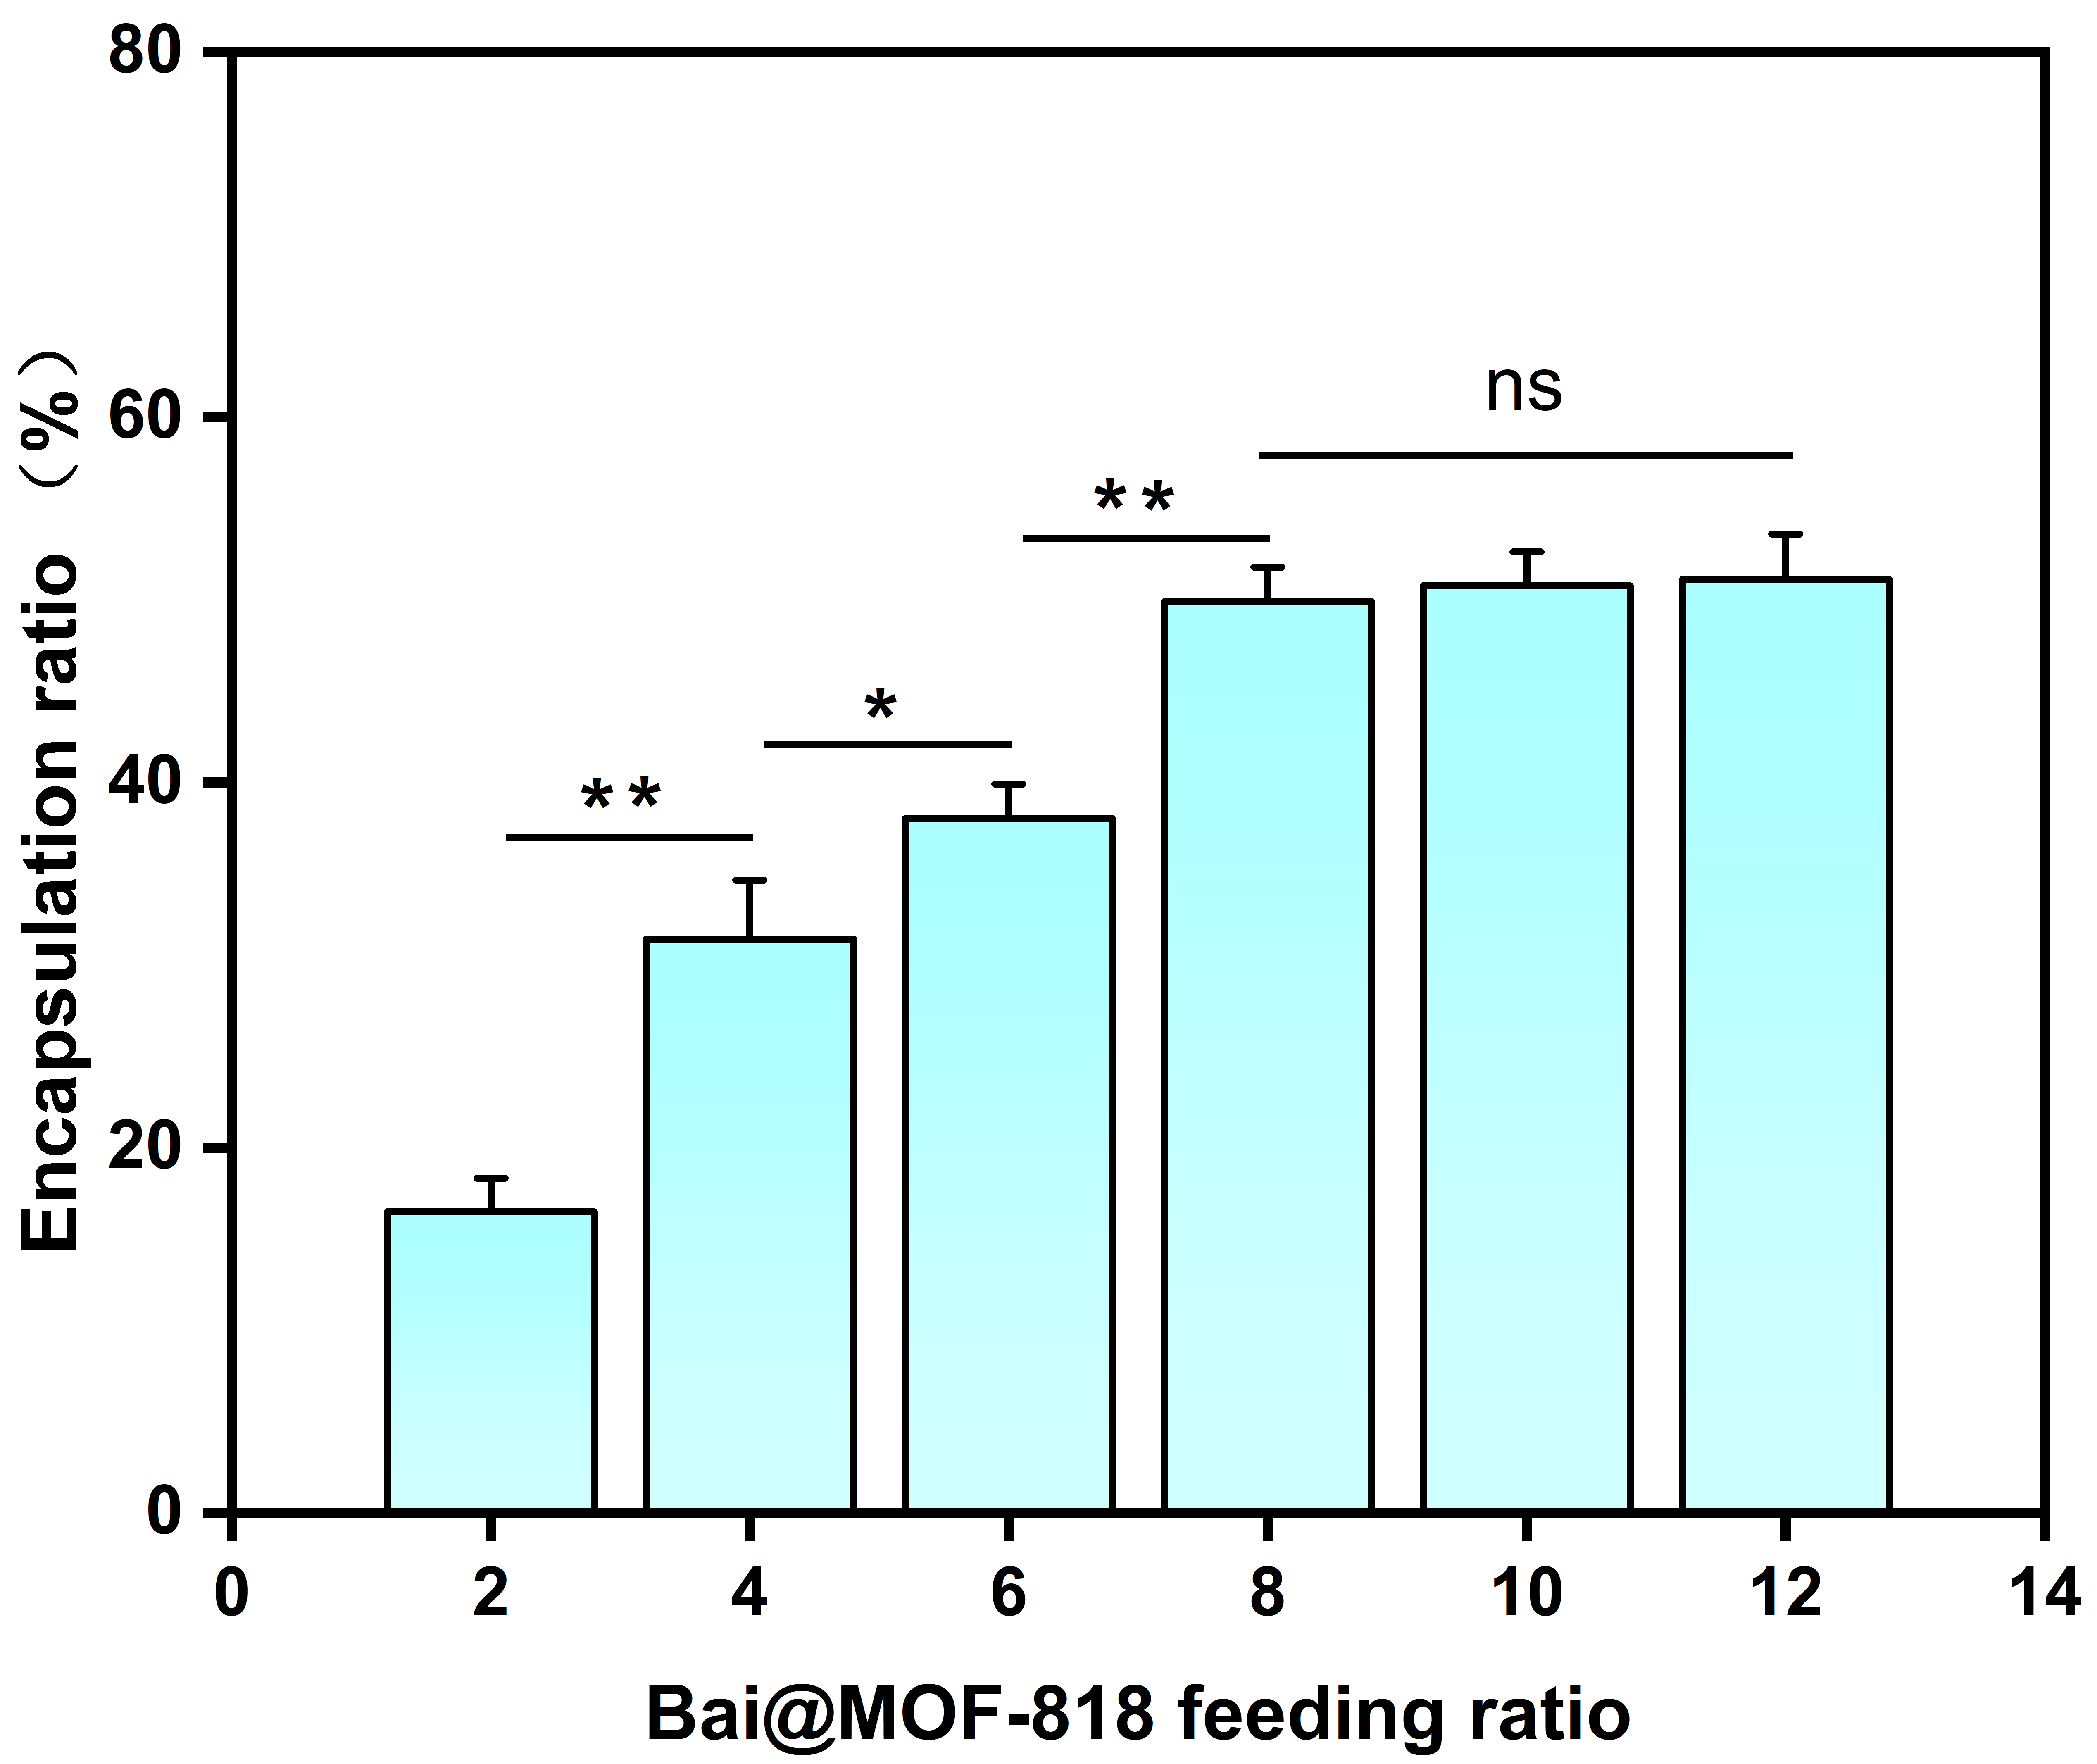
**

**Fig. S2.** Encapsulation ratio of Bai@MOF-818 at different feeding ratios. The data are presented as the mean ± sd. *p < 0.05, **p < 0.01.

**
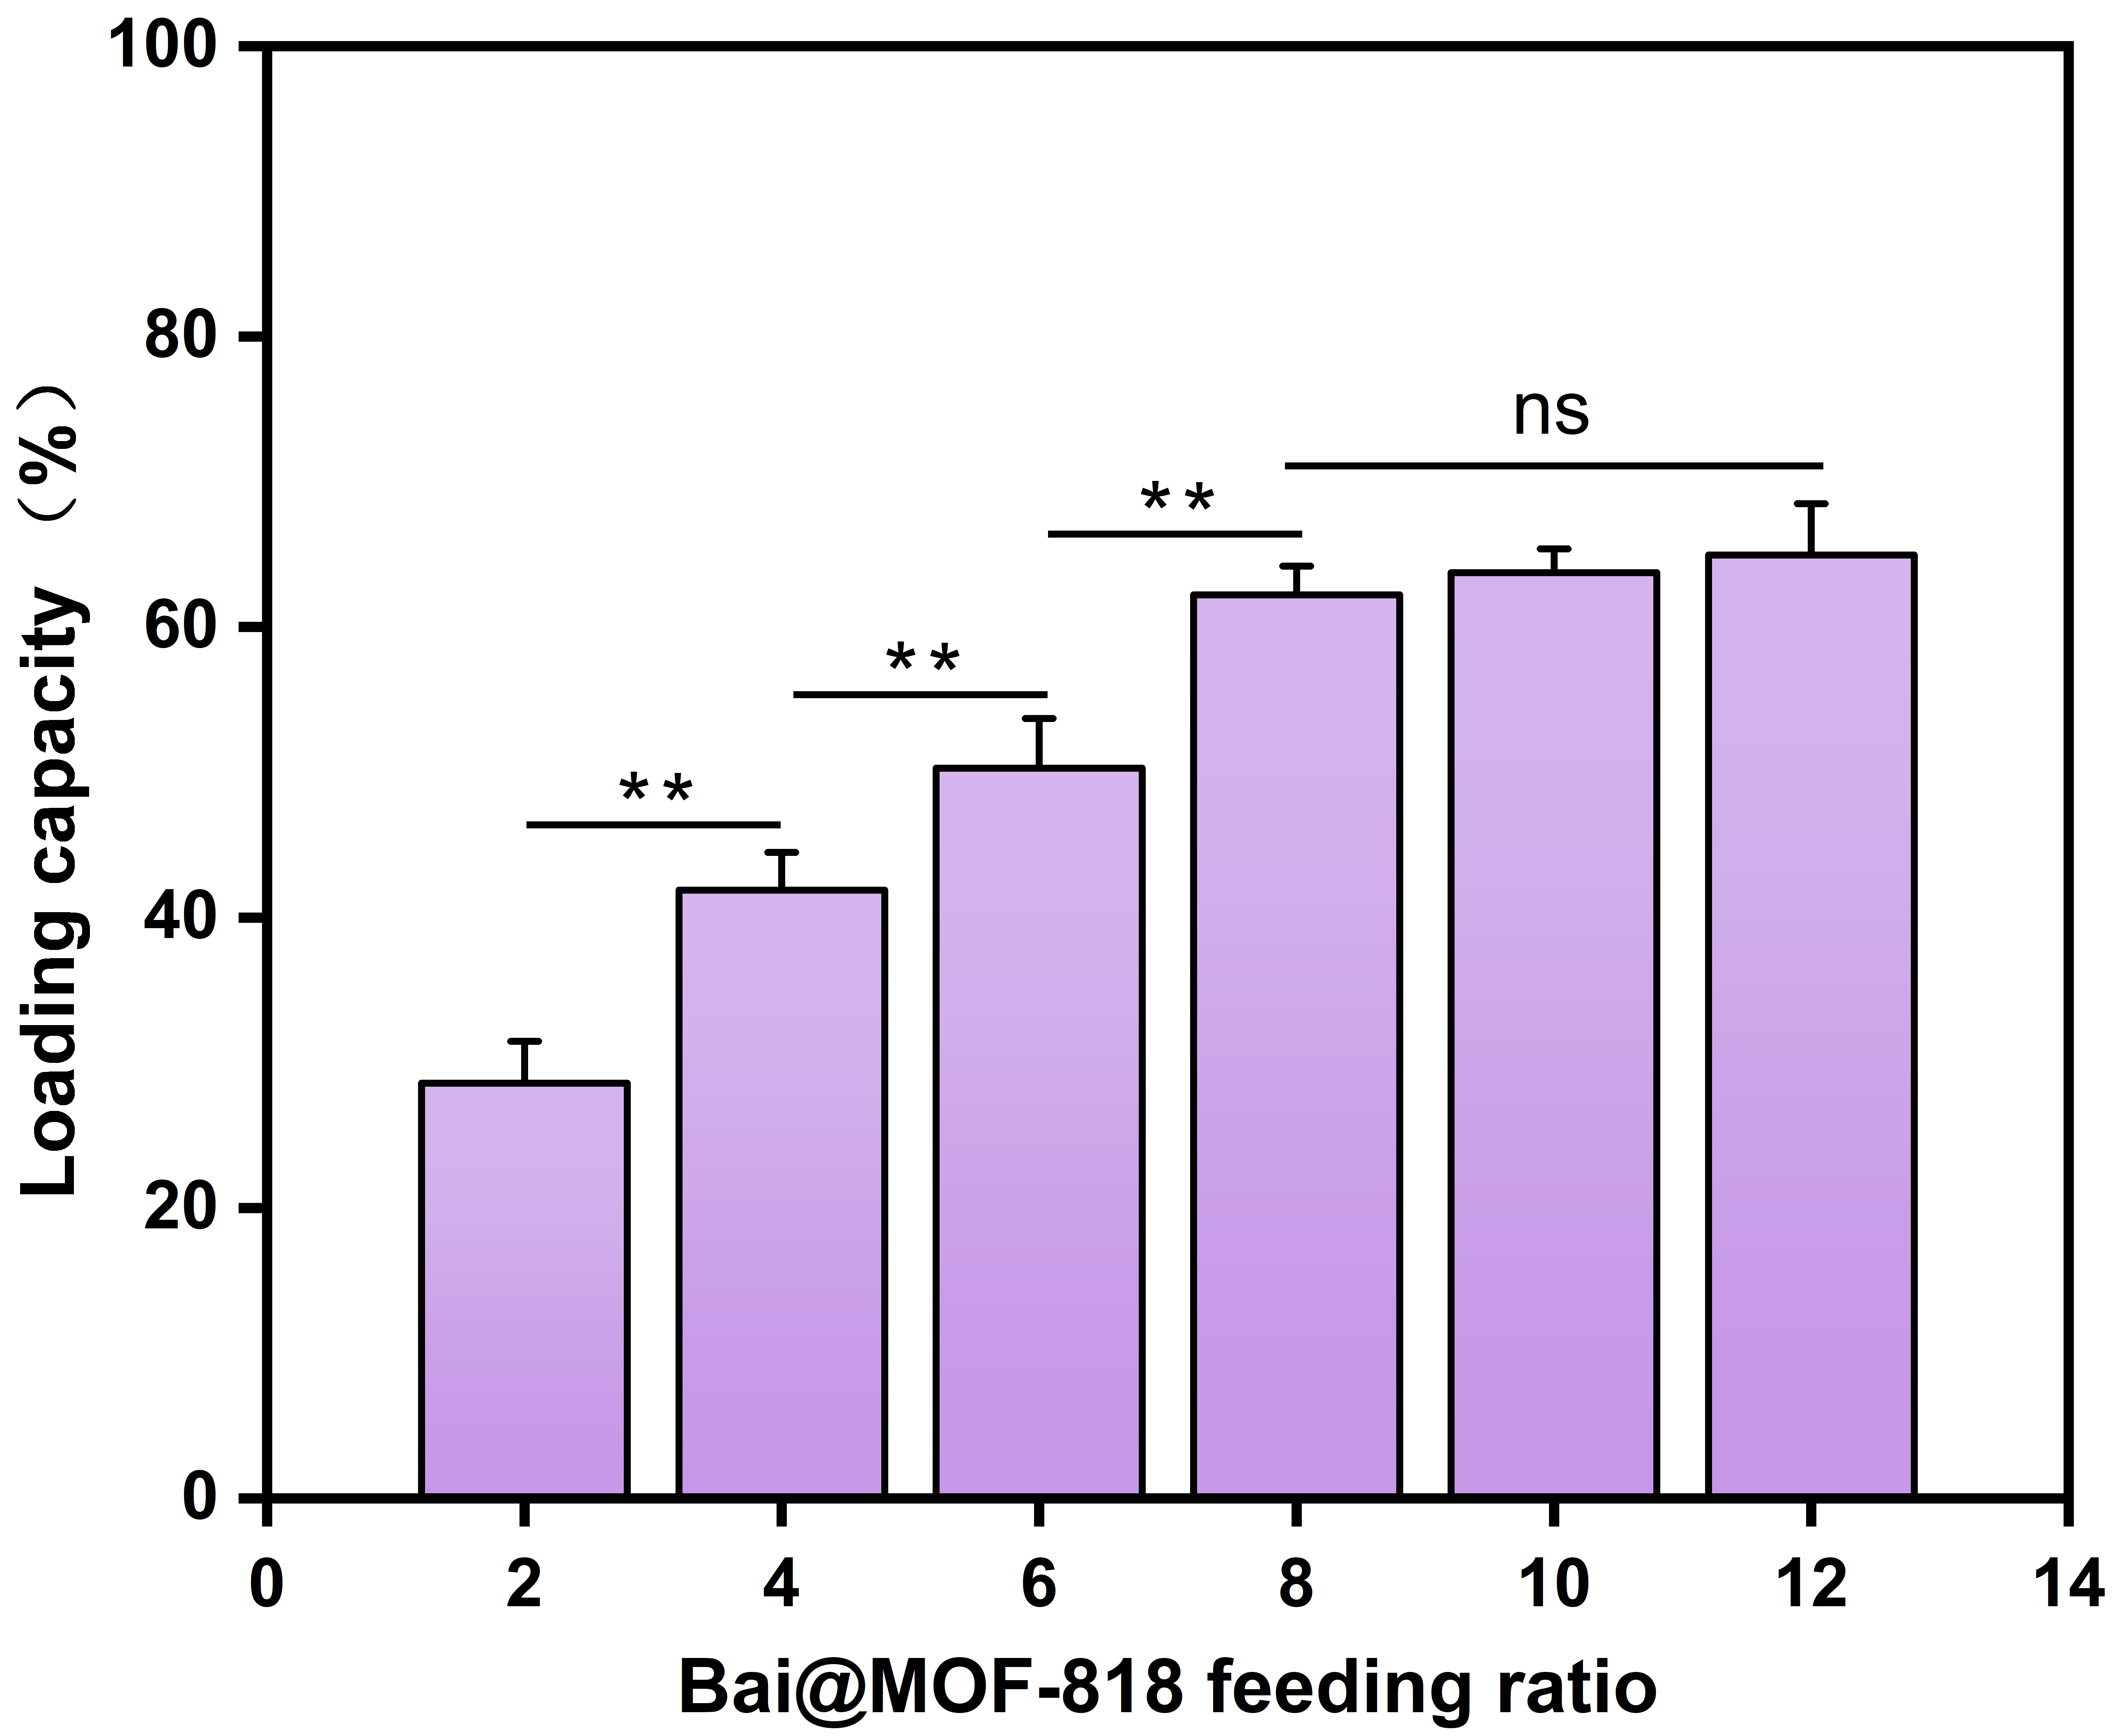
**

**Fig. S3.** Loading capacity of Bai@MOF-818 at different feeding ratios. The data are presented as the mean ± sd. *p < 0.05, **p < 0.01.

**
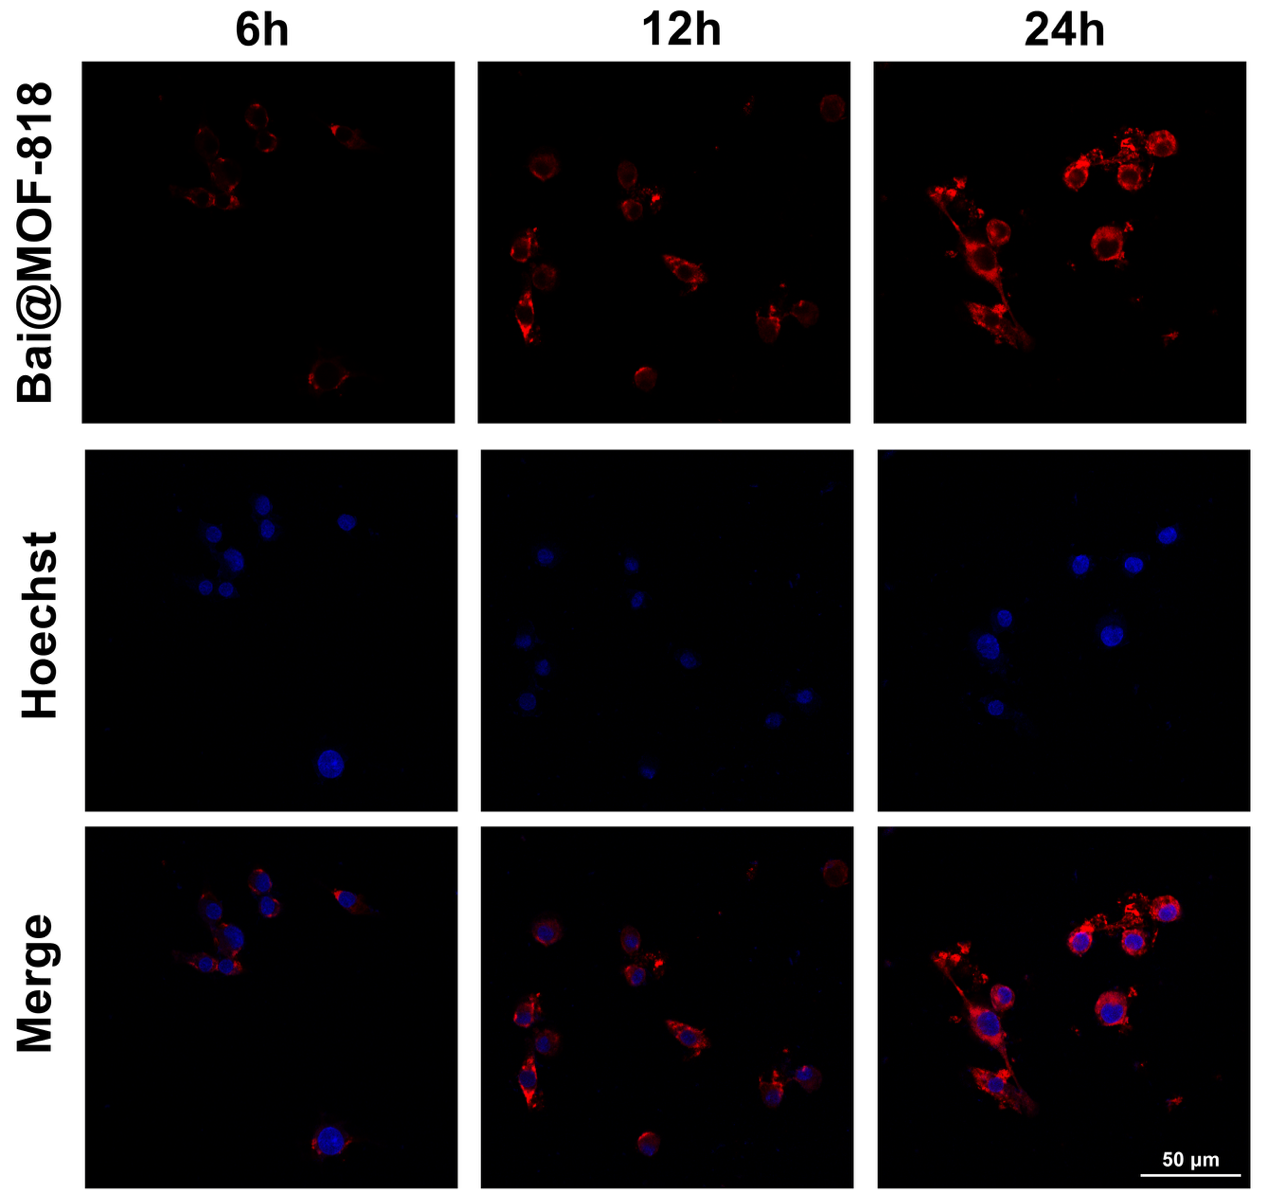
**

**Fig. S4.** Cellular uptake of Rhodamine B-labeled MOF-818 in PC-12 cells. The data are presented as the mean ± sd. *p < 0.05, **p < 0.01.

**
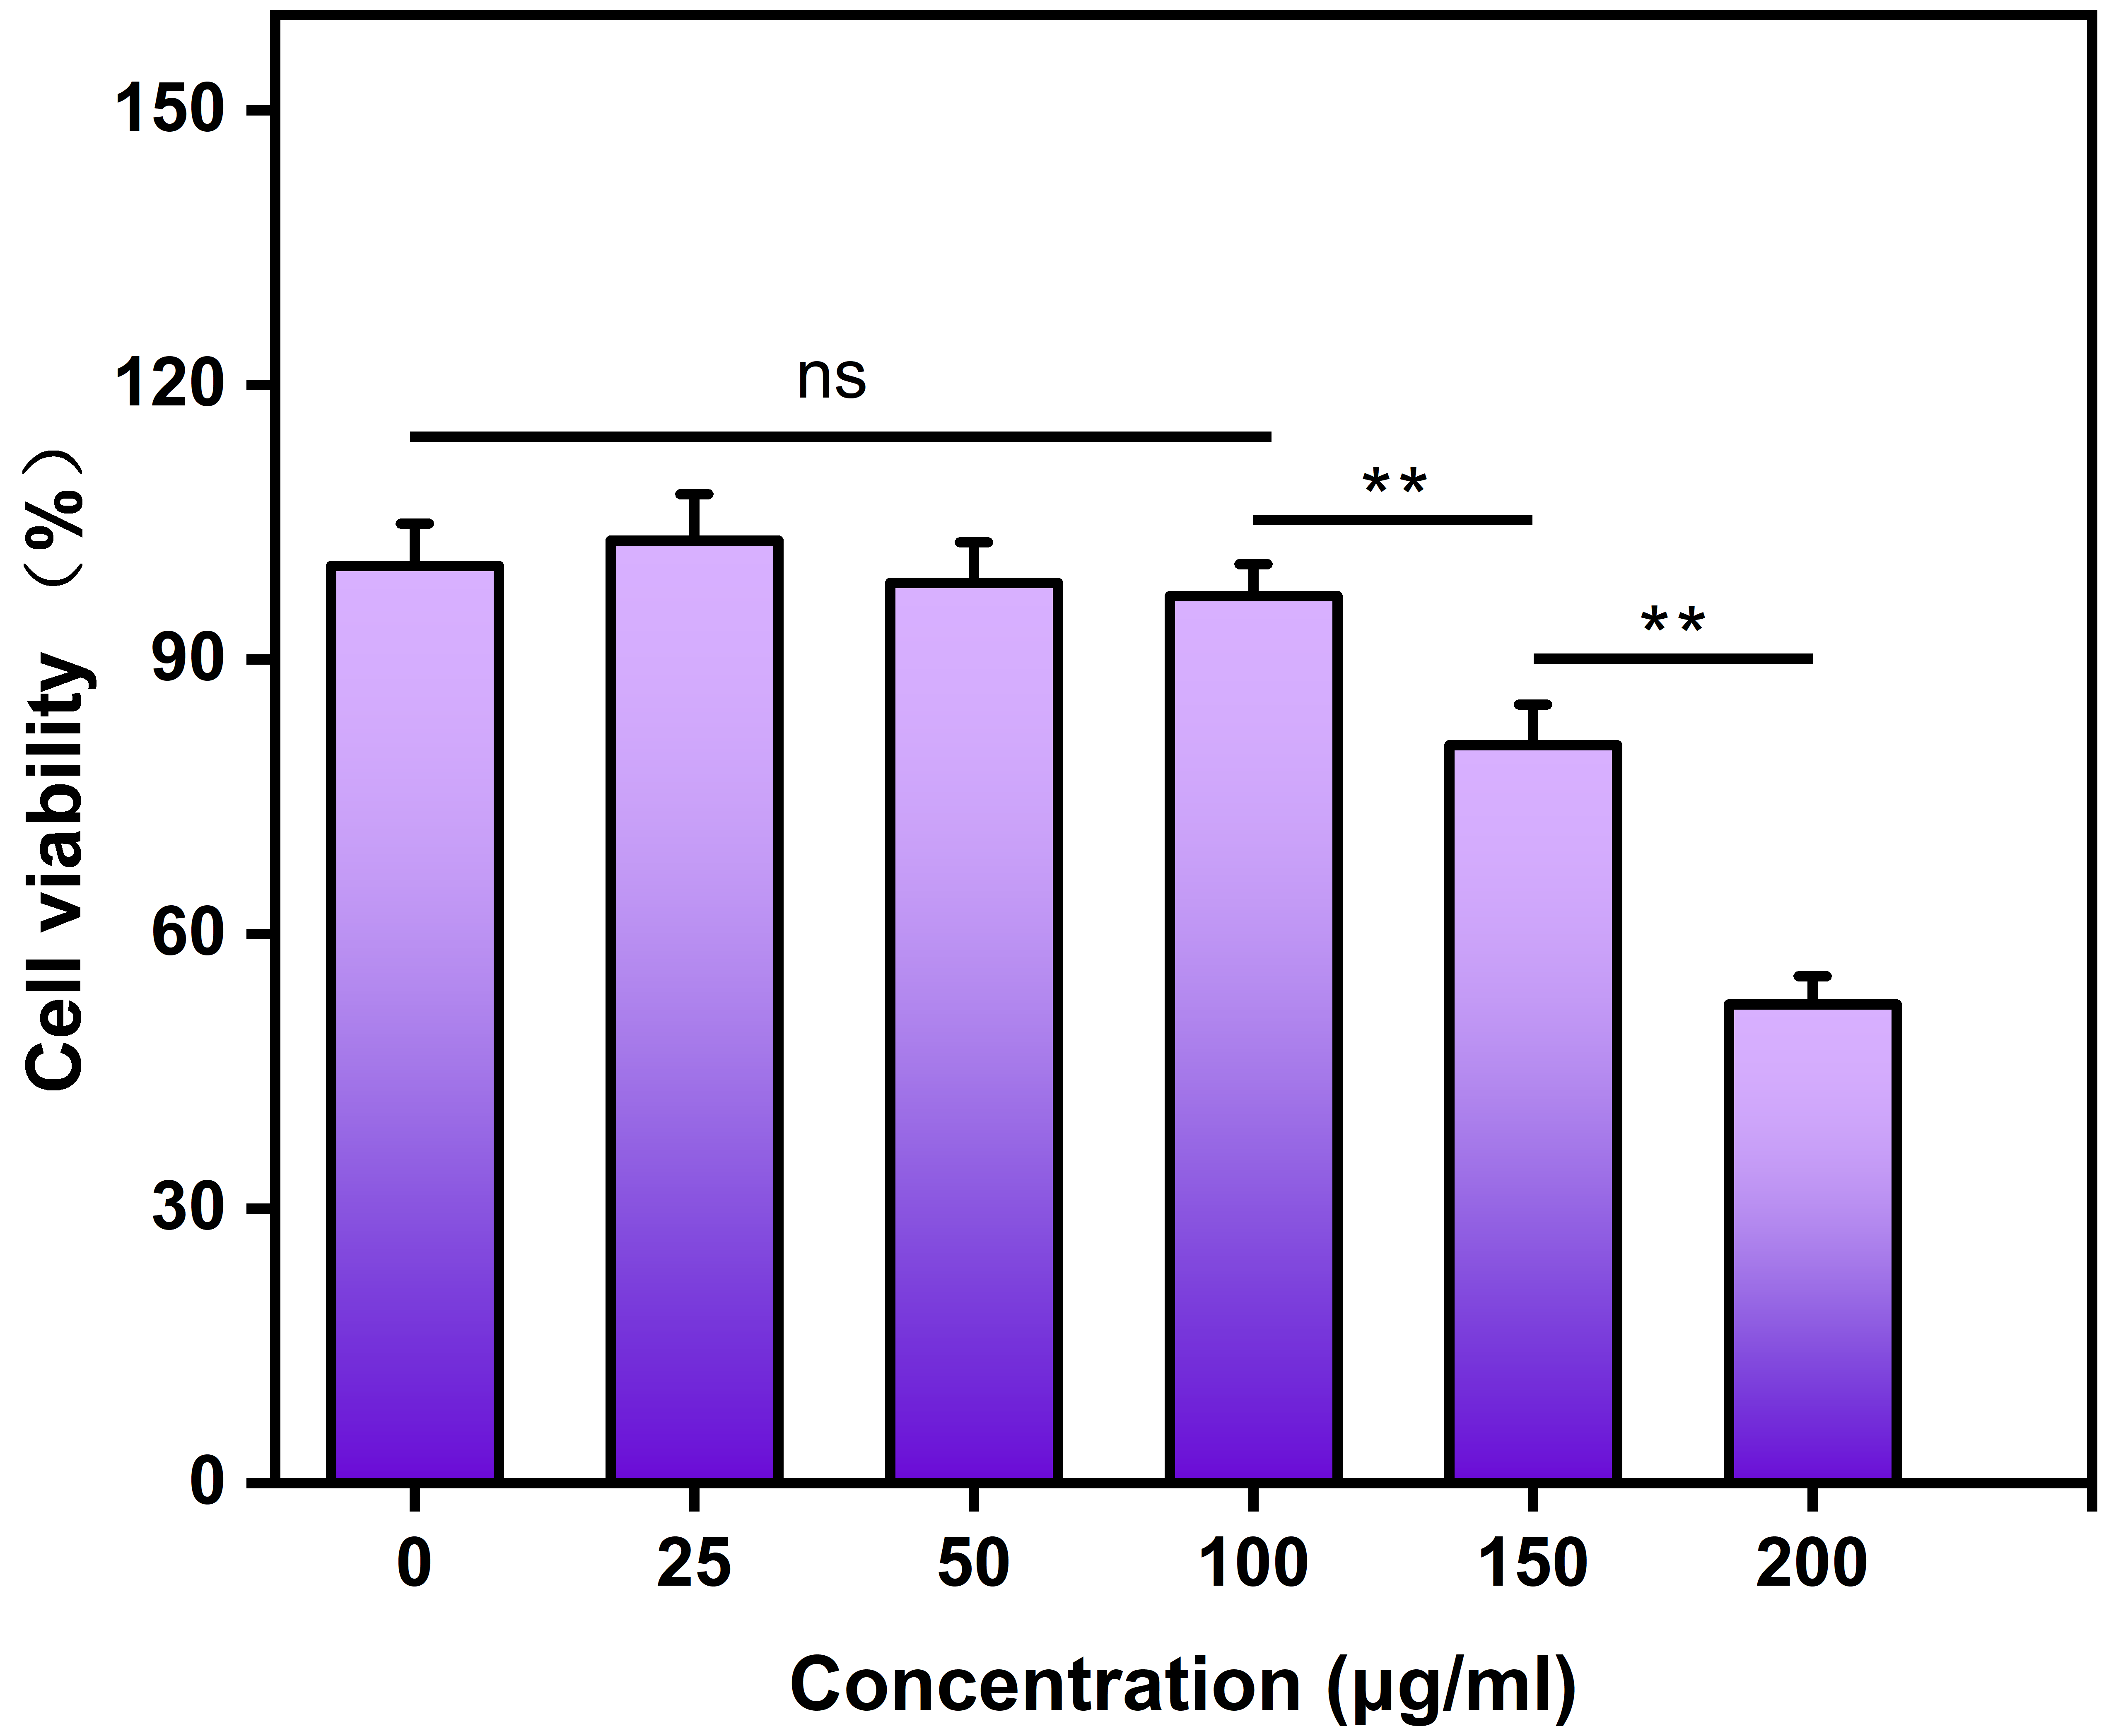
**

**Fig. S5.** Viability of PC-12 cells after incubation with different concentrations of Bai@MOF-818. The data are presented as the mean ± sd. *p < 0.05, **p < 0.01.

**
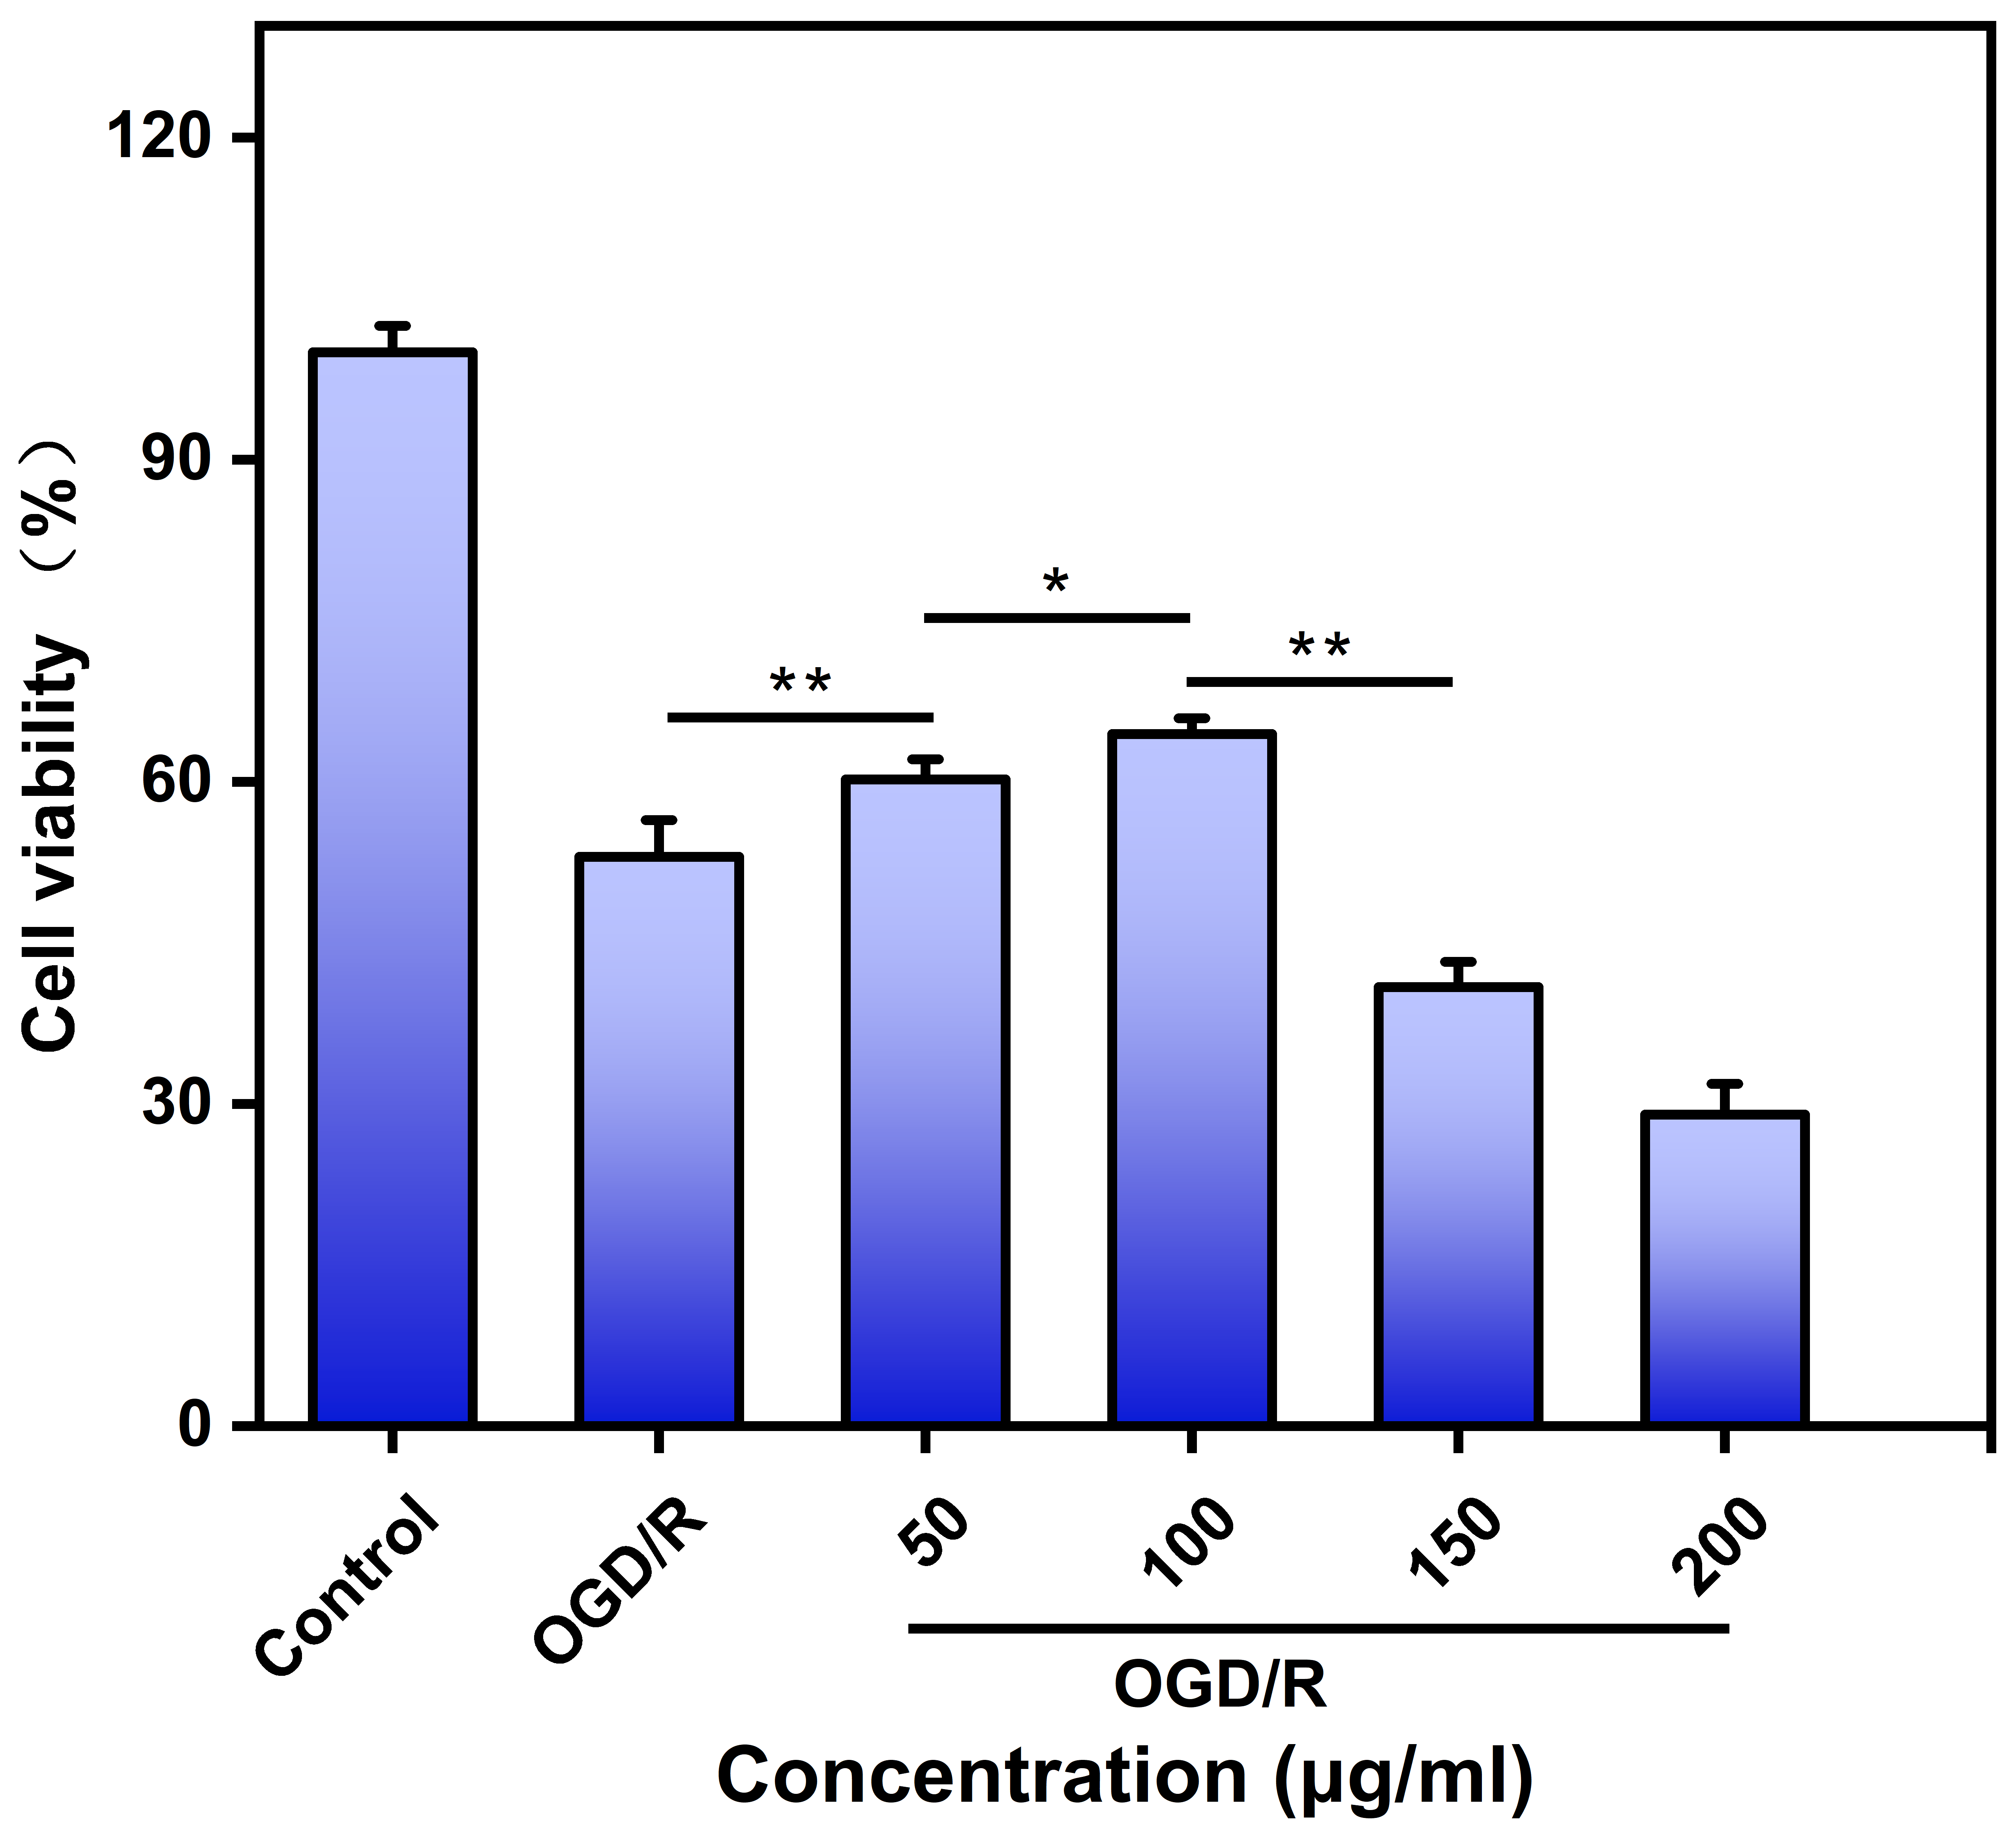
**

**Fig. S6.** Viability of PC-12 cells after incubation with different concentrations of Bai@MOF-818 under OGD/R condition. The data are presented as the mean ± sd. *p < 0.05, **p < 0.01.

**
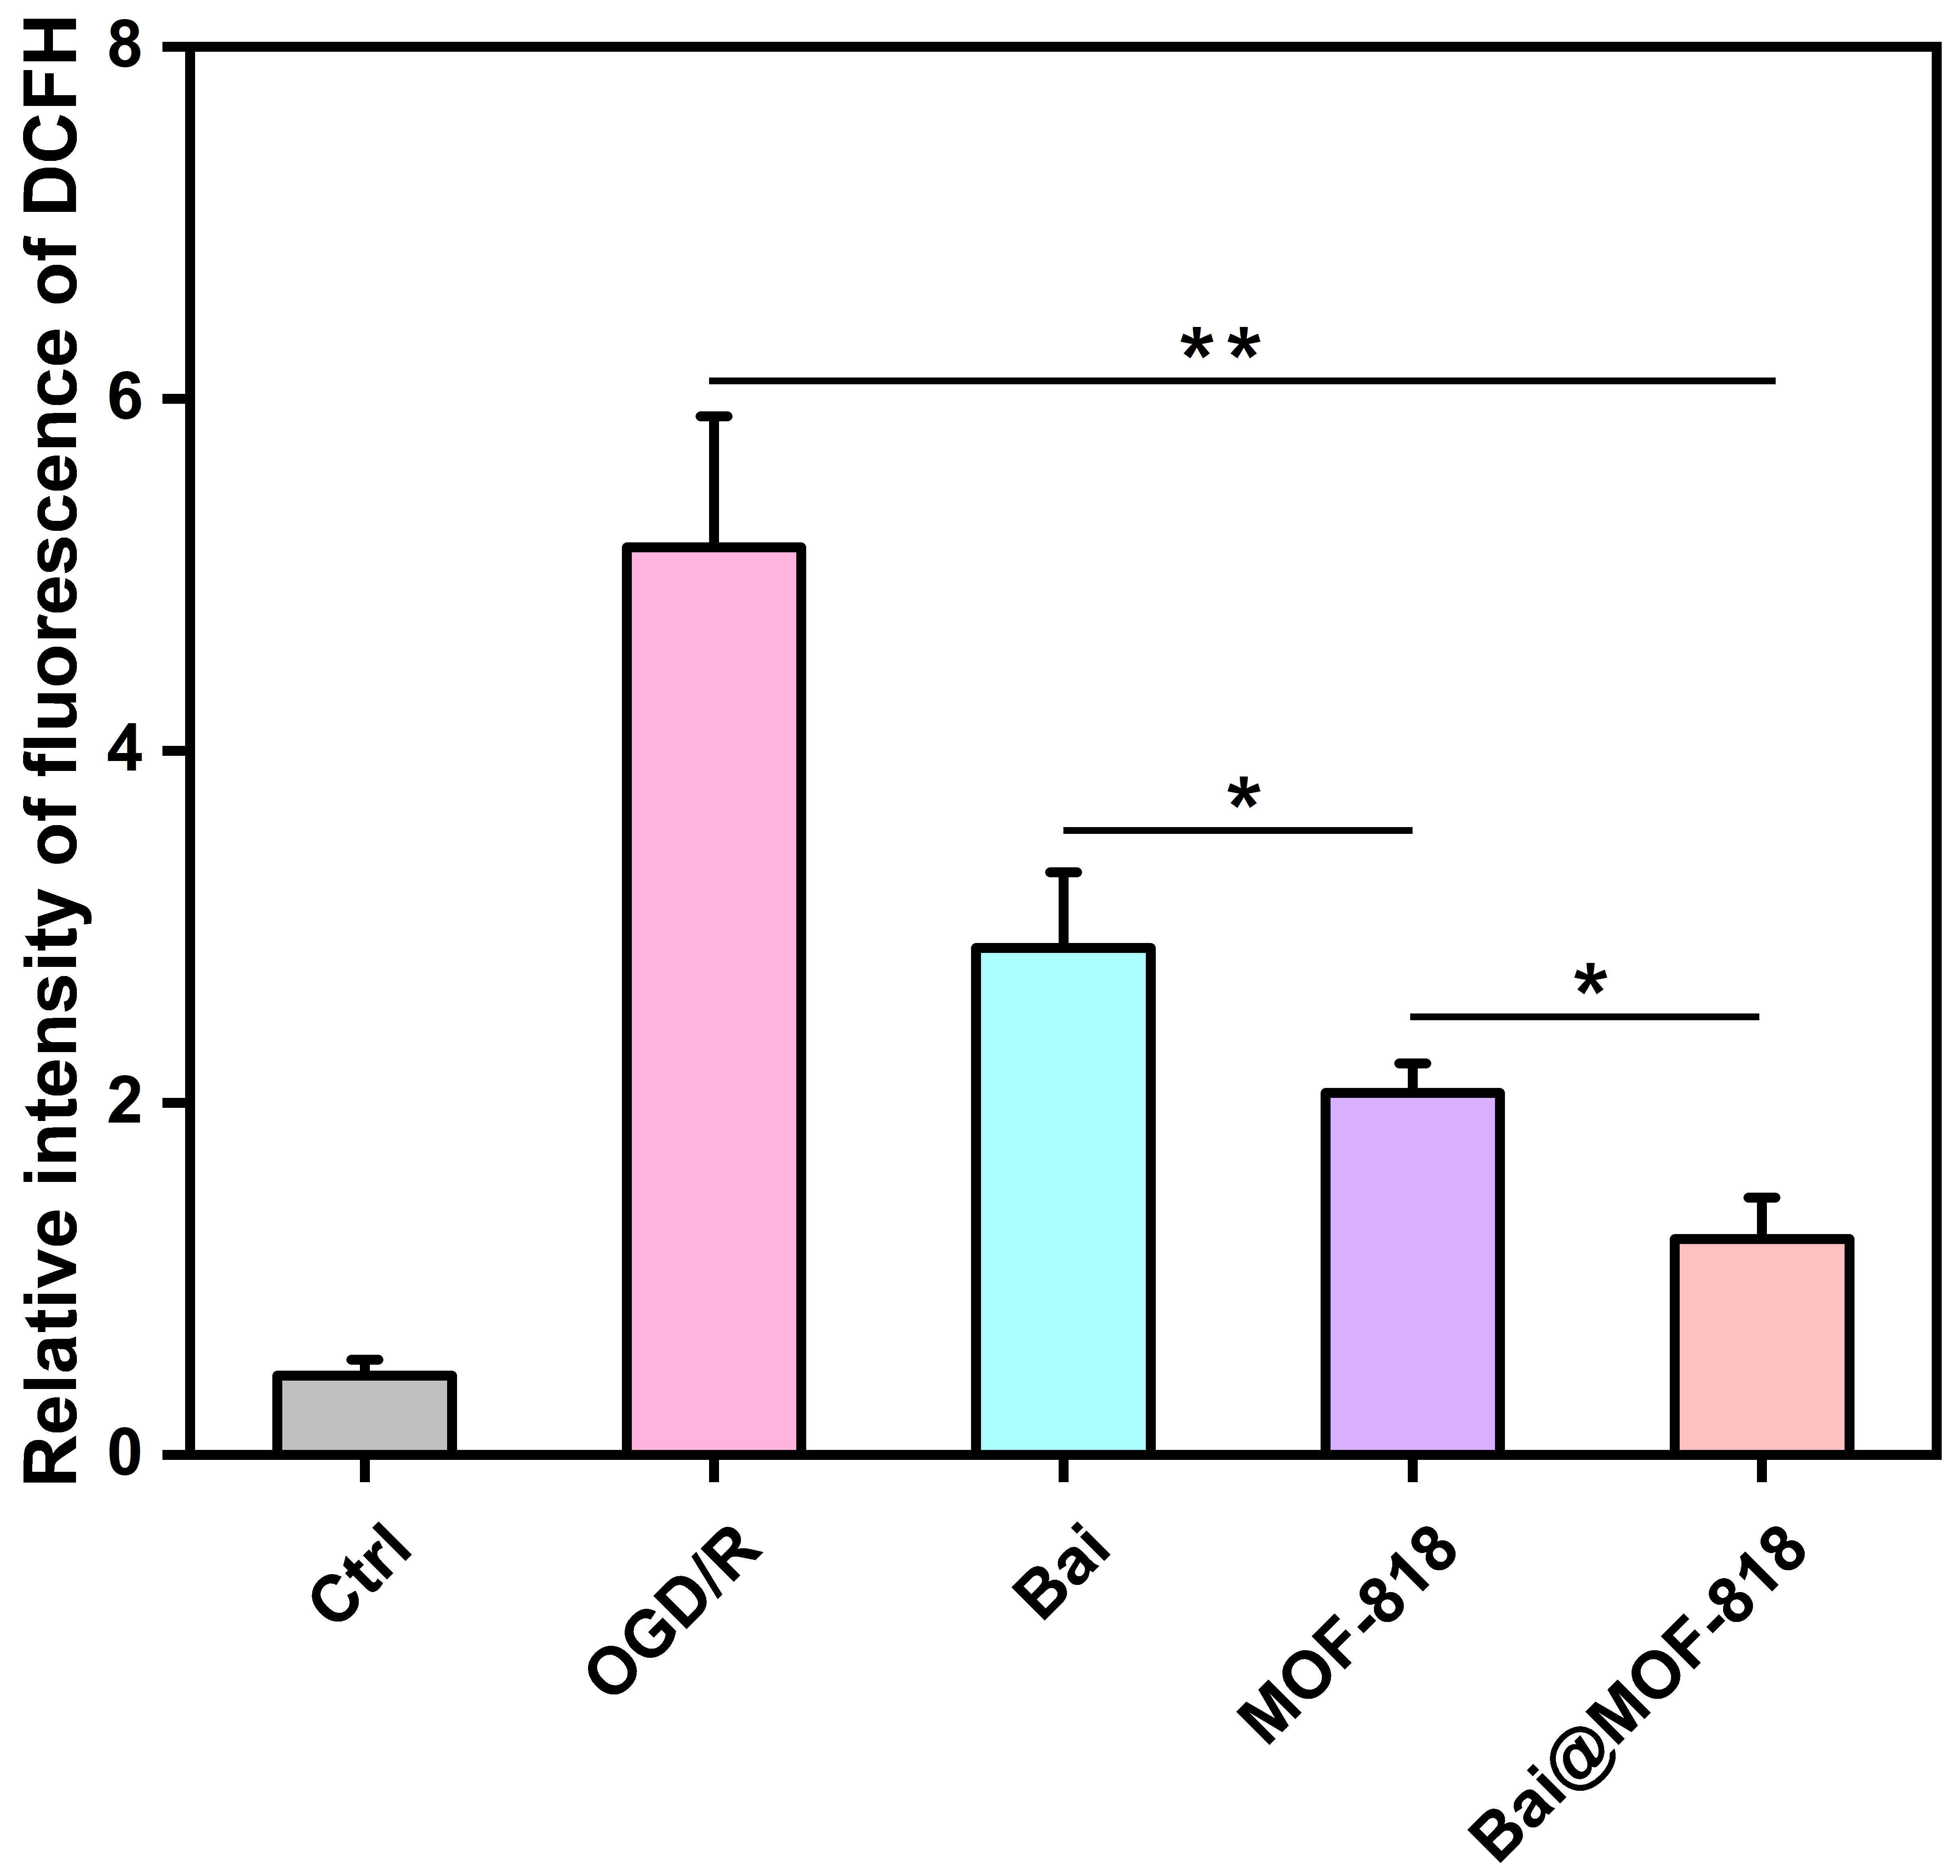
**

**Fig. S7.** Quantification of DCFH-DA fluorescence (n= 3). The data are presented as the mean ± sd. *p < 0.05, **p < 0.01.

**
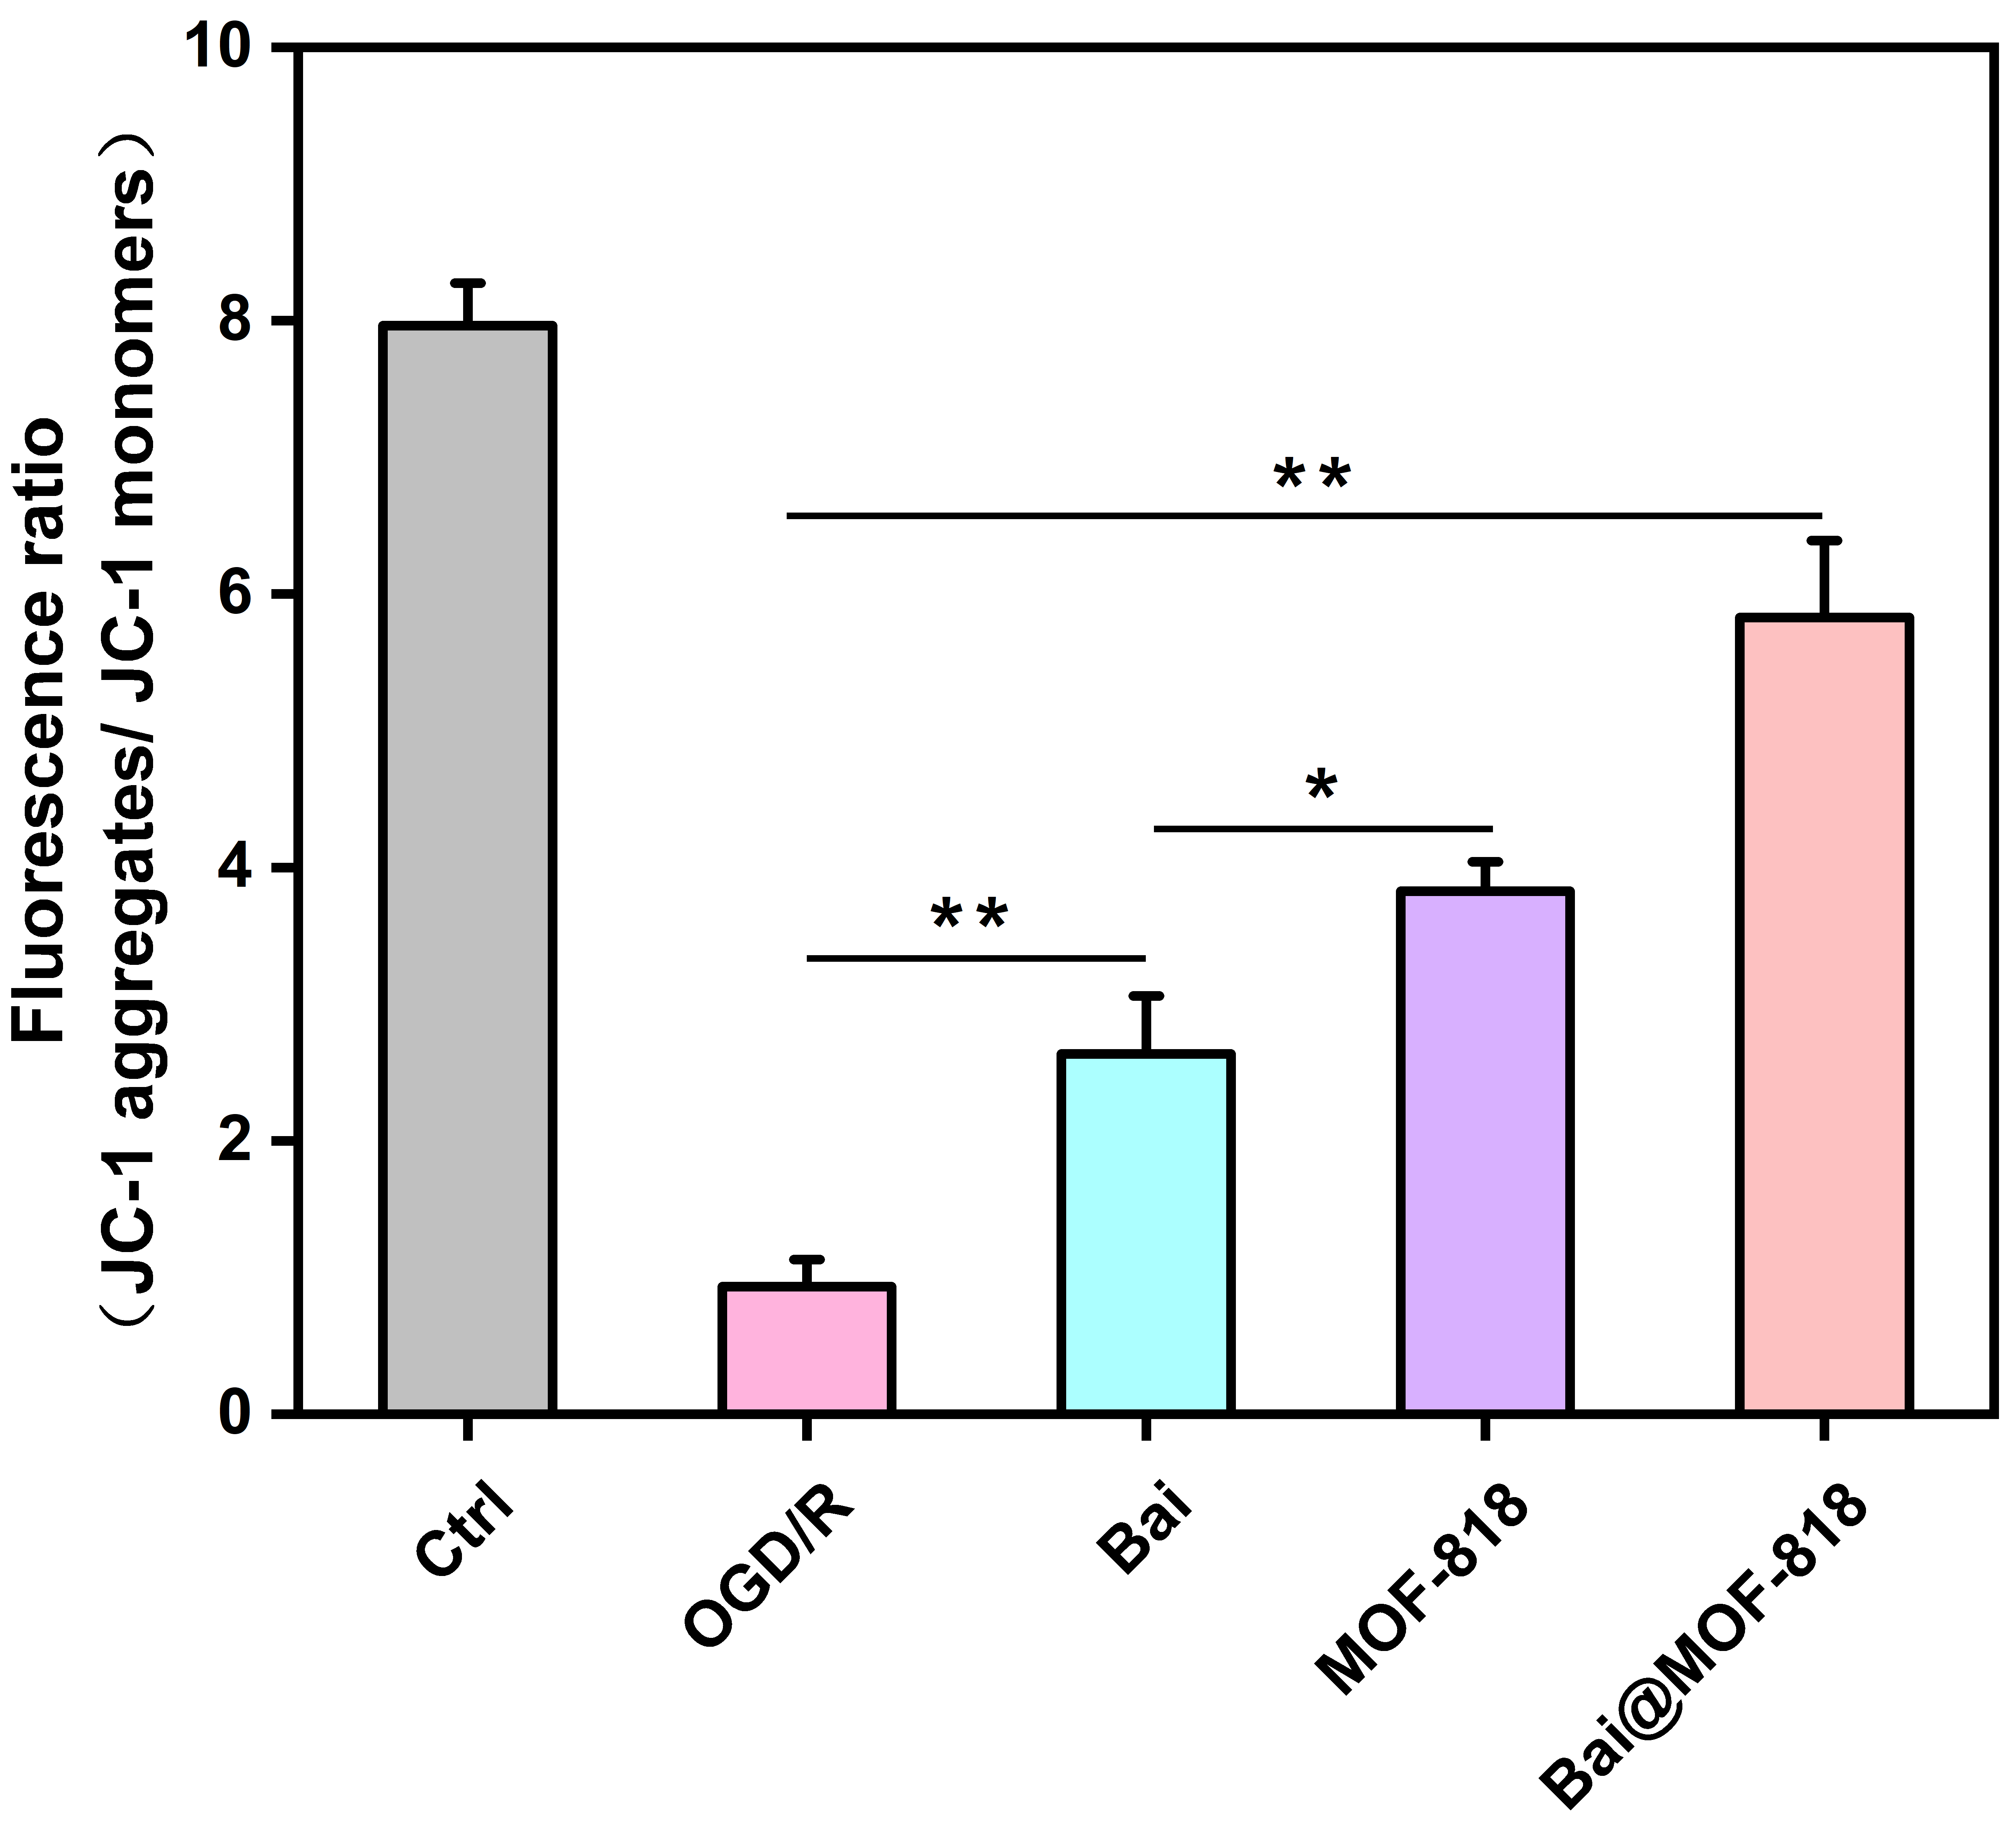
**

**Fig. S8.** Quantitative analysis of mitochondrial Δ𝜓m (n= 3). The data are presented as the mean ± sd. *p < 0.05, **p < 0.01.

**
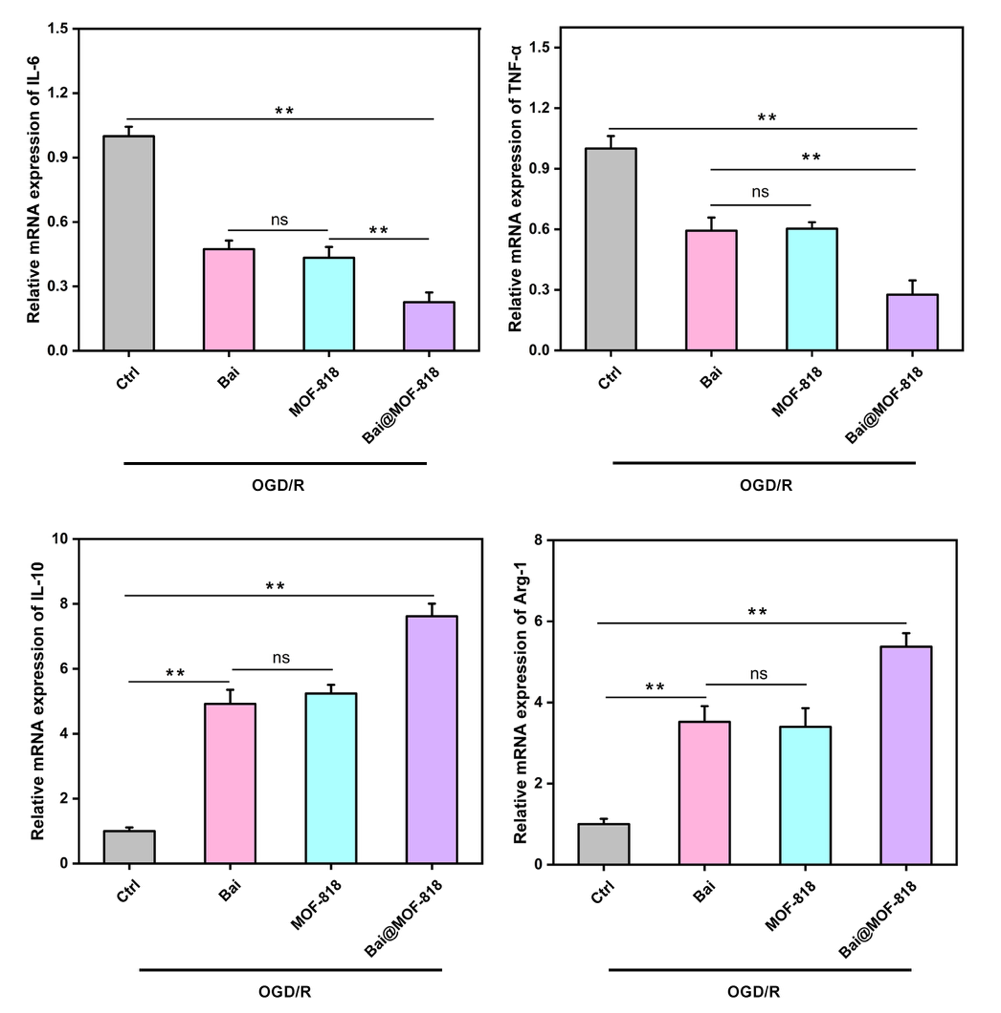
**

**Fig. S9.** mRNA expression of IL-6, TNF-α, IL-10, and Arg-1 in each group (n= 3). The data are presented as the mean ± sd. *p < 0.05, **p < 0.01.

**
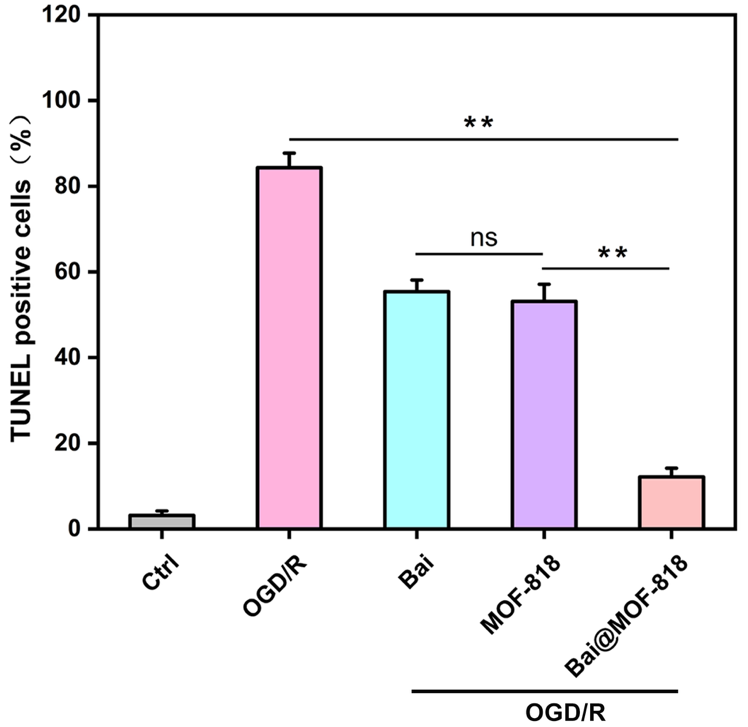
**

**Fig. S10.** Quantitative analysis of TUNEL-positive cells in each group (n= 3). The data are presented as the mean ± sd. *p < 0.05, **p < 0.01.

**
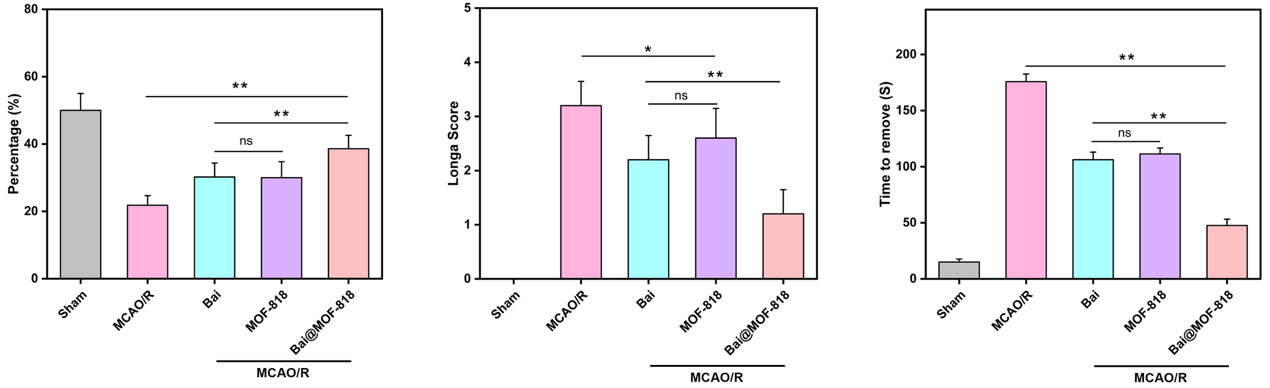
**

**Fig. S11. Behavioral function assessments after MCAO/R.** (A) Cylinder test. (B) Longa neurological deficit score. (C) Adhesive Tape Removal Test. The data are presented as the mean ± sd (n= 5). *p < 0.05, **p < 0.01.

**
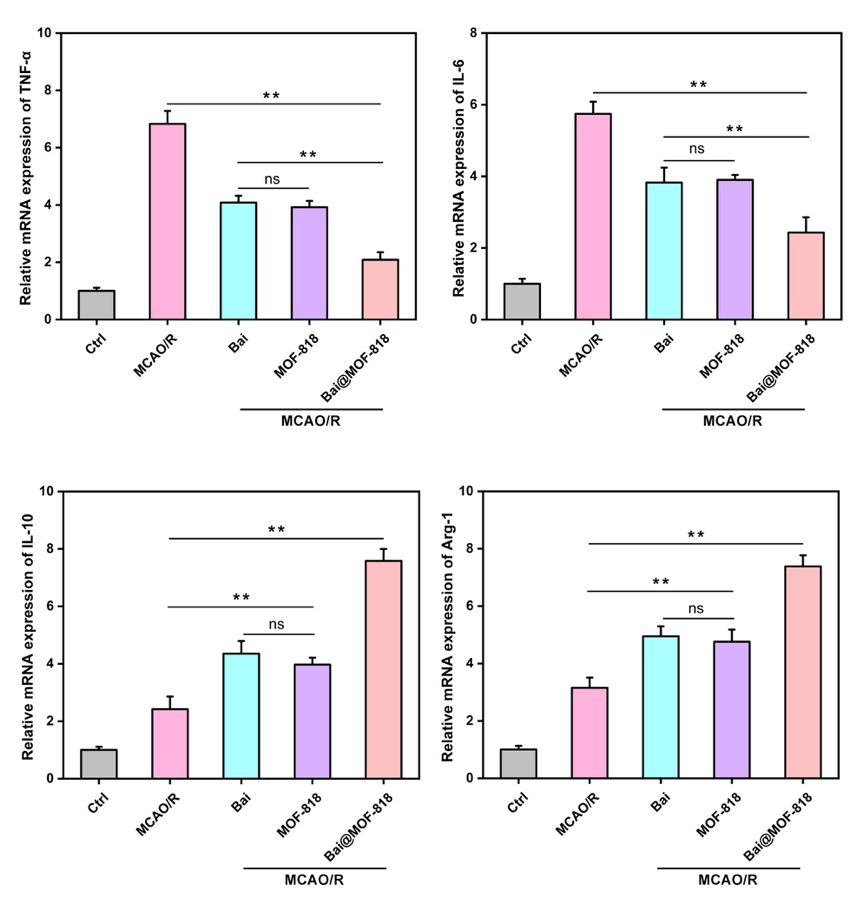
**

**Fig. S12.** RT-qPCR analysis of inflammatory marker gene expression (Arg-1, TNF-α, IL-6, and IL-10). The data are presented as the mean ± sd (n= 3). *p < 0.05, **p < 0.01.


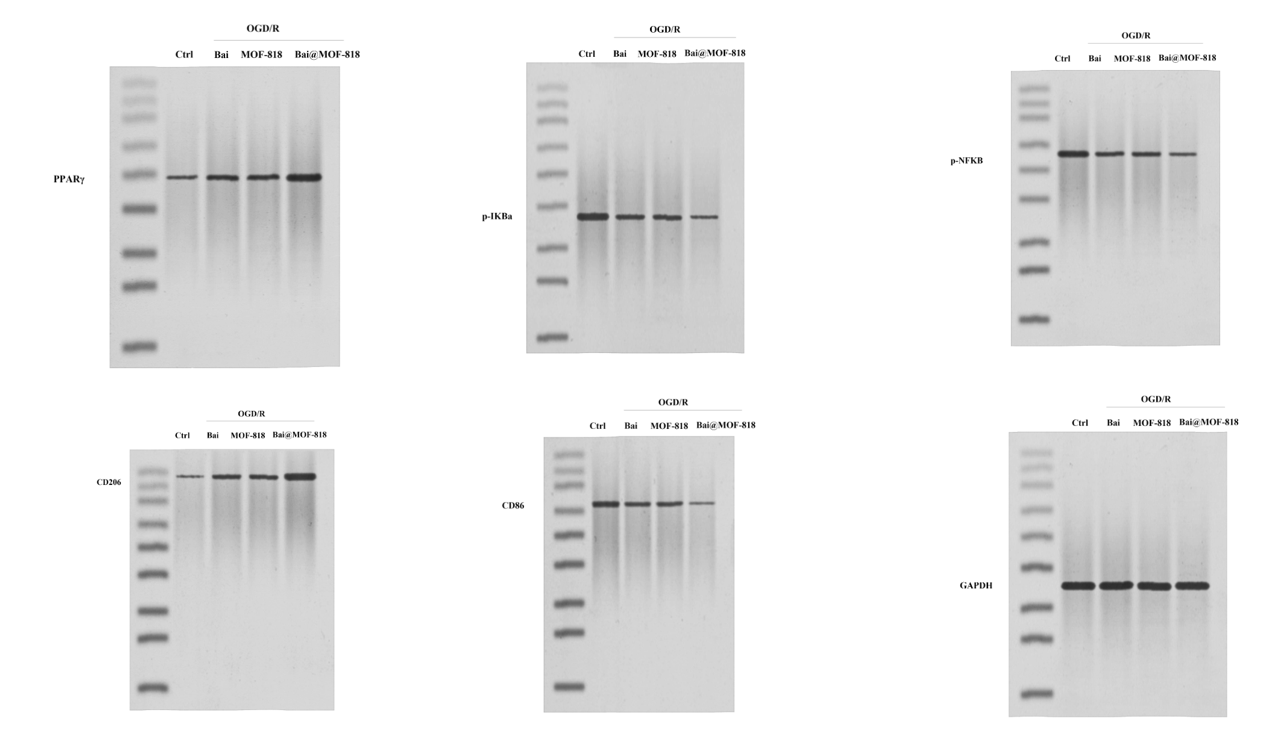


**Fig. S13.** Full, uncropped Western blots from independent replicate experiments corresponding to Figure 4 in the main manuscript.


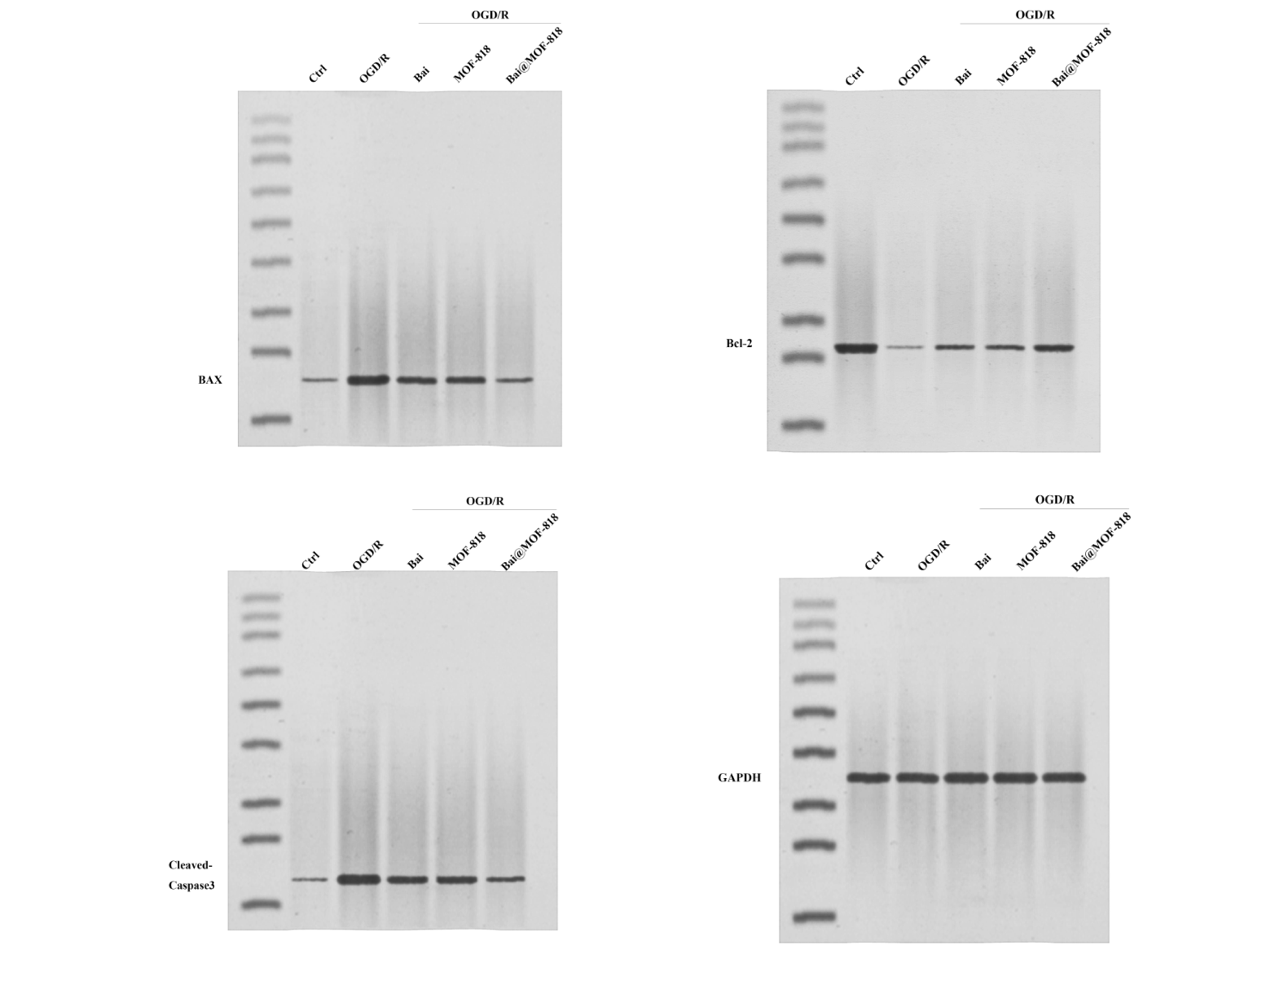


**Fig. S14.** Full, uncropped Western blots from independent replicate experiments corresponding to Figure 5 in the main manuscript.
