# Supplementary material
Source: Research Square preprint supplement (doi:10.21203/rs.3.rs-10195517/v1)
Supplement: Supplementary file 2 [file f0376b4b299f6f12e60156fd.docx]

**Table S1.** Primer sequences for Q-PCR analysis.

| **Gene** | **Forward primer** | **Reverse primer** |
| --- | --- | --- |
| IL-6 | GAGTCCTTCAGAGAGATACAG | CTGTGACTCCAGCTTATCTG |
| Arg-1 | TCTGCCAAAGACATCGTGTACAT | CGACATCAAAGCTCAGGTGAATC |
| IL-10 | CTGCTCTTACTGGCTGGAGTGAAG | TGGGTCTGGCTGACTGGGAAG |
| TNF-α | AGCCGATGGGTTGTACCTTG | ATAGCAAATCGGCTGACGGT |

**Table S2.** Related information about primary antibodies

| **Product name** | **Species** | **Catalog number** | **Source** |
| --- | --- | --- | --- |
| GAPDH | Rabbit | AF1186 | Beyotime, China |
| Bax | Rabbit | AF1270 | Beyotime, China |
| Bcl-2 | Rabbit | AF6285 | Beyotime, China |
| Cleaved-Caspase3 | Rabbit | # 9661 | CST, America |
| iNOS | Rabbit | Ab178945 | Abcam, England |
| Arg-1 | Rabbit | # 93668 | CST, America |
| CD206 | Rabbit | AG2660 | Beyotime, China |
| CD86 | Rabbit | AG1453 | Beyotime, China |
| PPARγ | Rabbit | AF7797 | Beyotime, China |
| p-NF-κB | Rabbit | # 3033 | CST, America |
| p-IκBα | Rabbit | # 2859 | CST, America |
| HRP- IgG (H+L) | Goat | A0208 | Beyotime, China |
