# Supplementary material
Source: Research Square preprint supplement (doi:10.21203/rs.3.rs-10195517/v1)
Supplement: Supplementary file 3 [file ff631de1839430e49eeba4e8.docx]

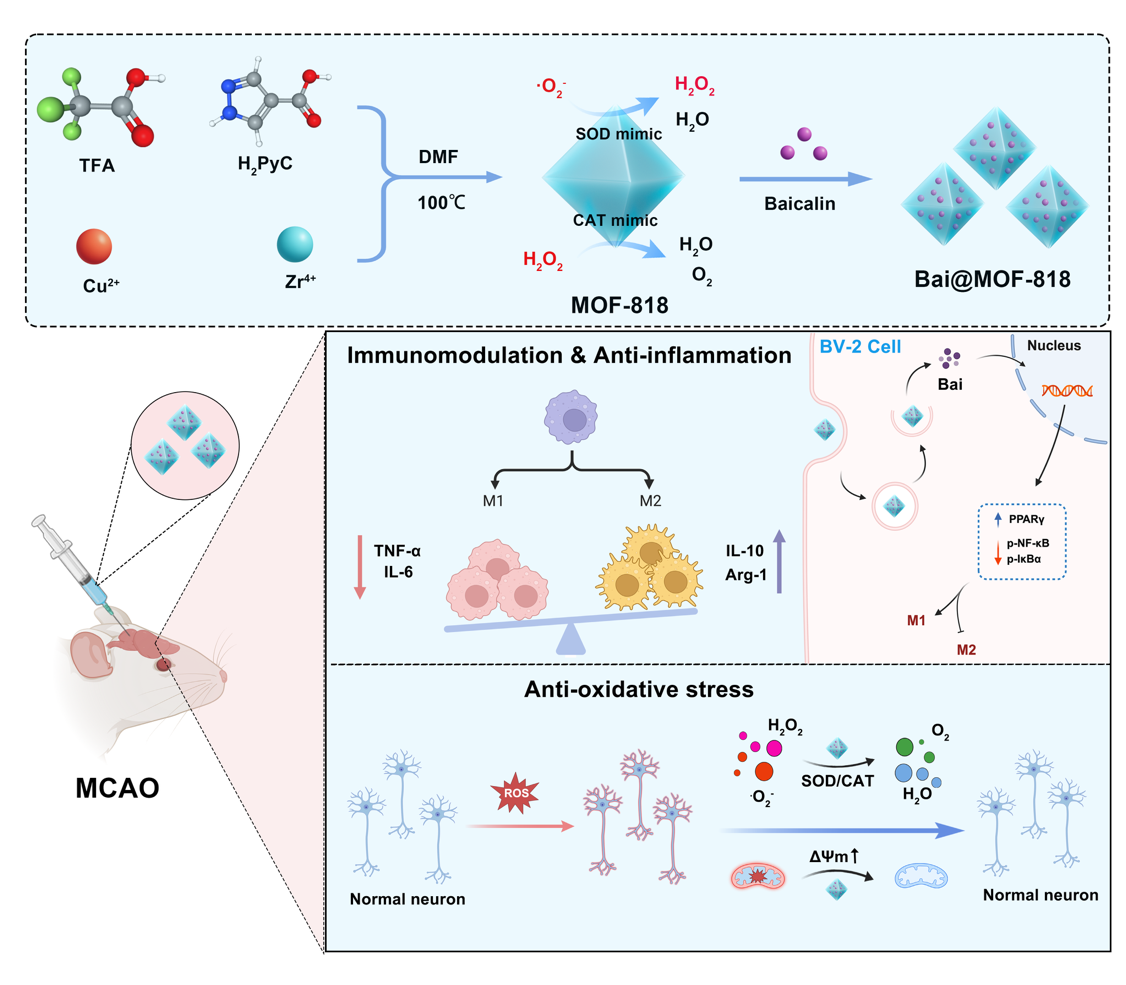


**Scheme 1.** Schematic illustration of Bai@MOF-818 therapy for ischemic stroke via ROS clearance, immune modulation, and anti-inflammatory effects.
